# Supplementary material
Source: HighWire-hosted journal article supplement (https://nutrition.bmj.com/content/6/2/253)
Supplement: inline-supplementary-material-1 [file inline-supplementary-material-1.pdf]

## Supplementary tables

**Table S1: Baseline socio demographic characteristics and anthropometric measurements of trial individuals (n=291)**

| Variables                                                   | Trial arms              |                         | Total                   |
|-------------------------------------------------------------|-------------------------|-------------------------|-------------------------|
|                                                             | Intervention            | Control                 |                         |
|                                                             | (n=159)                 | (n=132)                 | (n=291)                 |
|                                                             | Freq (%)                | Freq (%)                | Freq (%)                |
| <b>Sociodemographic characteristics</b>                     |                         |                         |                         |
| <b>Residency</b>                                            |                         |                         |                         |
| Patan                                                       | 149 (93.7)              | 126 (95.5)              | 275 (94.5)              |
| Dhulikhel                                                   | 10 (6.3)                | 6 (4.5)                 | 16 (5.5)                |
| <b>Ethnicity</b>                                            |                         |                         |                         |
| Newar                                                       | 134 (84.3)              | 112 (84.9)              | 246 (84.5)              |
| Other*                                                      | 25 (15.7)               | 20 (15.1)               | 45 (15.5)               |
| <b>Education</b>                                            |                         |                         |                         |
| More than high school                                       | 24 (15.1)               | 19 (14.4)               | 43 (14.8)               |
| High school or below                                        | 79 (49.7)               | 78 (59.1)               | 157 (54.0)              |
| No formal education                                         | 56 (35.2)               | 35 (26.5)               | 91(31.3)                |
| <b>Occupation</b>                                           |                         |                         |                         |
| Business                                                    | 52 (32.7)               | 48 (36.4)               | 100 (34.4)              |
| Housewife                                                   | 53 (33.3)               | 46 (34.8)               | 99 (34.0)               |
| Office                                                      | 31 (19.5)               | 16 (12.1)               | 47 (16.2)               |
| Other <sup>o</sup>                                          | 23 (14.5)               | 22 (16.7)               | 45 (15.5)               |
| <b>Marital Status</b>                                       |                         |                         |                         |
| Currently married                                           | 124 (78)                | 109 (82.6)              | 233 (80.1)              |
| Not currently married <sup>¥</sup>                          | 35 (22)                 | 23 (17.4)               | 58 (19.9)               |
| <b>Living status</b>                                        |                         |                         |                         |
| Living with family                                          | 154 (96.9)              | 129 (97.7)              | 283 (97.3)              |
| Living alone                                                | 5 (3.1)                 | 3 (2.3)                 | 8 (2.8)                 |
| <b>Annual household per capita income (USD)<sup>§</sup></b> | (n=158)                 | (n=132)                 | (n=290)                 |
| ##                                                          | 862.3<br>(517.4-1293.4) | 862.3<br>(597.4-1164.1) | 862.3<br>(517.4-1293.4) |
| Above international poverty line <sup>‡</sup>               | 95 (60.1)               | 83 (62.9)               | 178 (61.4)              |
| Below international poverty line                            | 63 (39.9)               | 49 (37.1)               | 112 (38.6)              |
| <b>Anthropometric measurement</b>                           |                         |                         |                         |
|                                                             | (n=101)                 | (n=87)                  | (n=188)                 |
| <b>BMI (kg/m<sup>2</sup>) #</b>                             | 28.8 (4.1)              | 28.9 (4.0)              | 28.8 (4.0)              |
| <b>BMI category €</b>                                       | (n=101)                 | (n=87)                  | (n=188)                 |

|                                            |            |            |            |
|--------------------------------------------|------------|------------|------------|
| Normal (18.5-24.9)                         | 17 (16.8)  | 10 (11.5)  | 27 (14.4)  |
| Overweight (25-29.9)                       | 47 (46.5)  | 47 (54.0)  | 94 (50.0)  |
| Obese ( $\geq 30$ )                        | 37 (36.6)  | 30 (34.5)  | 67 (35.6)  |
| <b>WHR category €€</b>                     | (n=158)    | (n=132)    | (n=290)    |
| High risk (F $\geq$ 0.86, M $\geq$ 1)      | 139 (87.9) | 124 (93.9) | 263 (90.7) |
| Moderate risk (F: 0.81-0.85, M: 0.96-0.99) | 8 (5.1)    | 5 (3.8)    | 13 (4.5)   |
| Low risk (F $\leq$ 0.8, M $\leq$ 0.95)     | 11 (7.0)   | 3 (2.3)    | 14 (4.8)   |

\* Brahmin, Chhetri, Magar, Tamang, Sherpa, Rai, Limbu, Madhesi, Shah, Dalit

<sup>o</sup> Agriculture, Driver, Teacher, Student, Retired, Unemployed, other

<sup>¥</sup> Never married, Separated, Widowed

\$1 USD = NRs115.97 dated 8 Feb 2021

# Mean (SD)

## Median (IQR)

<sup>z</sup> International Poverty line is defined as annual equivalent of 1.9USD income per day = 80425 NRs per year.

€ as per WHO guideline for Standard BMI Category

€€ as per WHO guideline for WHR Category

BMI: Body mass index; Kg/m<sup>2</sup>: Kilogram per meter square; WHR: Waist-hip ratio; F: Female; M: Male

**Table S2. Baseline lifestyle and clinical characteristics (n=291)**

| Variables                                | Trial arms              |                    | Total        |
|------------------------------------------|-------------------------|--------------------|--------------|
|                                          | Intervention<br>(n=159) | Control<br>(n=132) | (n=291)      |
|                                          | Freq (%)                | Freq (%)           | Freq (%)     |
| Lifestyle characteristics                |                         |                    |              |
| <b>Smoking status</b>                    | (n=158)                 | (n=132)            | (n=290)      |
| Current                                  | 14 (8.7)                | 19 (14.4)          | 33 (11.4)    |
| Former                                   | 2 (1.3)                 | 6 (4.5)            | 8 (2.8)      |
| Non smoker                               | 142 (89.9)              | 107 (81.1)         | 249 (85.9)   |
| <b>Alcohol status</b>                    | (n=158)                 | (n=131)            | (n=289)      |
| Current                                  | 63 (39.8)               | 48 (36.6)          | 111 (38.4)   |
| Former                                   | 5 (3.2)                 | 4 (3.1)            | 9 (3.1)      |
| Never                                    | 90 (57.0)               | 79 (60.3)          | 169 (58.5)   |
| <b>METs mins/week ##</b>                 | (n=158)                 | (n=132)            | (n=290)      |
|                                          | 800 (0-1680)            | 840 (100-1680)     | 820 (0-1680) |
| <b>METs category £</b>                   | (n=158)                 | (n=132)            | (n=290)      |
| <600 mins/week                           | 67 (42.4)               | 57 (43.2)          | 124 (42.8)   |
| ≥600 mins/week                           | 91 (57.6)               | 75 (56.8)          | 166 (57.2)   |
| <b>Sleep duration category @</b>         | (n=154)                 | (n=130)            | (n=284)      |
| Recommended (7-9 hrs)                    | 104 (67.5)              | 105 (80.8)         | 209 (73.6)   |
| Maybe appropriate (6-6.99 or 9.1-11 hrs) | 41 (26.6)               | 20 (15.3)          | 61 (21.5)    |
| Not recommended (<6 or >11 hrs)          | 9 (5.9)                 | 5 (3.9)            | 14 (4.9)     |
| <b>Balanced diet</b>                     | (n=158)                 | (n=132)            | (n=290)      |
| Yes                                      | 23 (14.6)               | 26 (19.7)          | 49 (16.9)    |
| No                                       | 106 (67.1)              | 93 (70.5)          | 199 (68.6)   |
| No information                           | 29 (18.3)               | 13 (9.8)           | 42 (14.5)    |
| <b>Small frequent meals</b>              | (n=158)                 | (n=132)            | (n=290)      |
| Yes                                      | 13 (8.2)                | 13 (9.9)           | 26 (9.0)     |
| No                                       | 135 (85.5)              | 115 (87.1)         | 250 (86.2)   |
| No information                           | 10 (6.3)                | 4 (3.0)            | 14 (4.8)     |
| <b>Sugary food consumption</b>           | (n=158)                 | (n=131)            | (n=289)      |
| Always                                   | 35 (22.1)               | 25 (19.1)          | 60 (20.8)    |
| Sometimes                                | 66 (41.8)               | 74 (56.5)          | 140 (48.4)   |
| Occasionally                             | 7 (4.4)                 | 3 (2.3)            | 10 (3.5)     |
| Never                                    | 50 (31.7)               | 29 (22.1)          | 79 (27.3)    |

|                                                                                                                |                  |                  |                  |
|----------------------------------------------------------------------------------------------------------------|------------------|------------------|------------------|
| <b>Food group categories (gm/day)</b>                                                                          |                  |                  |                  |
| Total grains                                                                                                   | (n=157)          | (n=131)          | (n=288)          |
| Median (IQR)                                                                                                   | 527<br>(400-684) | 587<br>(471-684) | 557<br>(438-684) |
| Total protein                                                                                                  | (n=149)          | (n=126)          | (n=275)          |
| Median (IQR)                                                                                                   | 285<br>(180-390) | 316<br>(225-415) | 300<br>(200-403) |
| Total vegetables                                                                                               | (n=156)          | (n=130)          | (n=286)          |
| Median (IQR)                                                                                                   | 189<br>(107-242) | 192<br>(124-266) | 190<br>(117-249) |
| Total fruits                                                                                                   | (n=33)           | (n=20)           | (n=53)           |
| Median (IQR)                                                                                                   | 45 (38-87)       | 63 (44-91)       | 58 (40-87)       |
| Total fats oil                                                                                                 | (n=153)          | (n=128)          | (n=281)          |
| Median (IQR)                                                                                                   | 4.5 (3-6.5)      | 3.8 (2.9-5.1)    | 4.2 (3-5.5)      |
| Total salt                                                                                                     | (n=156)          | (n=130)          | (n=286)          |
| Median (IQR)                                                                                                   | 2.9 (2.4-4.3)    | 3.0 (2.3-4.3)    | 3.0 (2.1-4.3)    |
| <b>Clinical characteristics</b>                                                                                |                  |                  |                  |
| <b>Hypertension Status (SBP<math>\geq</math>140 or DBP<math>\geq</math>90 or anti-hypertensive medication)</b> | (n=149)          | (n=125)          | (n=274)          |
| Yes                                                                                                            | 90 (60.4)        | 82 (65.6)        | 172 (62.8)       |
| No                                                                                                             | 59 (39.6)        | 43 (34.4)        | 102 (37.2)       |
| <b>Family history of diabetes</b>                                                                              | (n=157)          | (n=132)          | (n=289)          |
| Both parent                                                                                                    | 4 (2.6)          | 8 (6.0)          | 12 (4.2)         |
| Either parent                                                                                                  | 44 (28.0)        | 43 (32.6)        | 87 (30.1)        |
| No family history                                                                                              | 109 (69.4)       | 81 (61.4)        | 190 (65.7)       |

## Median (IQR)

£ as per Global Physical Activity Questionnaire

@ as per National Sleep Foundation [Recommended (7-9 hrs), Maybe appropriate (6-6.99 or 9.1-11 hrs), Not recommended (<6 or >11 hrs)]

METs: Metabolic equivalent; mins/week: minutes per week; gm/day: gram per day; SBP: Systolic blood pressure; DBP: Diastolic blood pressure; IQR: Interquartile range

**Table S3: Effect of the intervention on HbA1c, weight and waist circumference (Subgroups analyses)**

|                                                     | Baseline |              | Post-intervention assessment |             | Mean diff (95% CI)*      | p-value |
|-----------------------------------------------------|----------|--------------|------------------------------|-------------|--------------------------|---------|
|                                                     | n        | Mean (SD)    | n                            | Mean (SD)   |                          |         |
| <b>HbA1c (%) (Primary outcome)</b>                  |          |              |                              |             |                          |         |
| <b>Mode of intervention</b>                         |          |              |                              |             |                          |         |
| Physical intervention                               | 59       | 5.95 (0.18)  | 57                           | 6.05 (0.28) | -0.047 (-0.147 to 0.053) | 0.36    |
| Digital intervention                                | 91       | 5.98 (0.23)  | 73                           | 6.18 (0.47) | 0.066 (-0.023 to 0.156)  | 0.15    |
| Mixed intervention                                  | 4        | 6.05 (0.17)  | 4                            | 6.10 (0.35) | -0.039 (-0.089 to 0.011) | 0.13    |
| <b>Follow-ups</b>                                   |          |              |                              |             |                          |         |
| No follow-up                                        | 36       | 5.95 (0.22)  | 32                           | 6.01 (0.31) | -0.077 (-0.177 to 0.023) | 0.13    |
| Monthly telephone follow-up                         | 16       | 5.86 (0.11)  | 14                           | 6.18 (0.61) | 0.102 (0.053 to 0.150)   | <0.01   |
| Biweekly telephone follow-up                        | 76       | 6.00 (0.23)  | 63                           | 6.16 (0.42) | 0.031 (-0.074 to 0.136)  | 0.57    |
| Weekly physical follow-up                           | 26       | 5.97 (0.16)  | 25                           | 6.14 (0.29) | 0.034 (-0.035 to 0.103)  | 0.33    |
| <b>Weight (kg) Secondary outcomes</b>               |          |              |                              |             |                          |         |
| <b>Mode of intervention</b>                         |          |              |                              |             |                          |         |
| Physical intervention                               | 30       | 70.2 (12.8)  | 57                           | 69.8 (12.1) | -2.1 (-4.0 to -0.2)      | 0.03    |
| Digital intervention                                | 64       | 70.2 (10.2)  | 73                           | 68.5 (9.9)  | -0.2 (-1.4 to 1.0)       | 0.78    |
| Mixed intervention                                  | 4        | 58.1 (6.4)   | 4                            | 59.1 (4.9)  | 0.6 (-0.0 to 1.3)        | 0.07    |
| <b>Follow-ups</b>                                   |          |              |                              |             |                          |         |
| No follow-up                                        | 10       | 73.7 (14.4)  | 32                           | 72.3 (12.1) | -1.0 (-2.6 to 0.6)       | 0.22    |
| Monthly telephone follow-up                         | 9        | 76.0 (10.3)  | 14                           | 72.2 (12.2) | -0.1 (-0.8 to 0.6)       | 0.83    |
| Biweekly telephone follow-up                        | 59       | 68.2 (9.6)   | 63                           | 67.2 (9.2)  | -0.3 (-1.5 to 0.9)       | 0.60    |
| Weekly physical follow-up                           | 20       | 69.53 (13.2) | 25                           | 66.5 (11.6) | -2.6 (-5.1 to -0.1)      | 0.04    |
| <b>Waist circumference (cm) (Secondary outcome)</b> |          |              |                              |             |                          |         |
| <b>Mode of intervention</b>                         |          |              |                              |             |                          |         |
| Physical intervention                               | 59       | 96.7 (8.2)   | 57                           | 94.6 (10.8) | 1.6 (-0.9 to 4.1)        | 0.21    |
| Digital intervention                                | 91       | 96.3 (8.1)   | 73                           | 91.4 (8.3)  | -0.7 (-2.7 to 1.3)       | 0.49    |
| Mixed intervention                                  | 4        | 94.3 (9.3)   | 4                            | 84.3 (2.5)  | -6.7 (-8.1 to -5.3)      | <0.001  |
| <b>Follow-ups</b>                                   |          |              |                              |             |                          |         |
| No follow-up                                        | 36       | 97.3 (8.8)   | 32                           | 95.2 (9.8)  | 1.5 (-0.1 to 3.0)        | 0.07    |
| Monthly telephone follow-up                         | 16       | 95.2 (6.6)   | 14                           | 93.5 (6.9)  | 2.0 (0.6 to 3.3)         | <0.001  |
| Biweekly telephone follow-up                        | 76       | 96.5 (8.1)   | 63                           | 90.5 (8.2)  | -1.7 (-4.1 to 0.8)       | 0.18    |
| Weekly physical follow-up                           | 26       | 95.6 (8.3)   | 25                           | 93.8 (12.7) | 1.8 (-3.7 to 7.2)        | 0.53    |

\*Mean difference between groups estimated by mixed linear model; HbA1c: Glycated hemoglobin; ITT: Intention-to-treat analysis; SD: Standard deviation; kg: Kilogram; cm: centimeter

**Table S4: Effect of the intervention on secondary outcomes physical activity and diet (Sub-groups analyses)**

| ITT                                                     | Baseline |             | Post-intervention assessment |              | Mean diff (95% CI)* | p-value |
|---------------------------------------------------------|----------|-------------|------------------------------|--------------|---------------------|---------|
|                                                         | n        | Mean (SD)   | n                            | Mean (SD)    |                     |         |
| <b>Physical activity (METs)<br/>(Secondary outcome)</b> |          |             |                              |              |                     |         |
| <b>Mode of intervention</b>                             |          |             |                              |              |                     |         |
| Physical intervention                                   | 59       | 2286 (4493) | 56                           | 576 (596)    | -125 (-471 to 222)  | 0.48    |
| Digital intervention                                    | 90       | 1680 (2993) | 79                           | 888 (1485)   | 187 (-21 to 396)    | 0.08    |
| Mixed intervention                                      | 4        | 760 (1000)  | 4                            | 450 (205)    | -209 (-340 to -78)  | 0.01    |
| <b>Follow-ups</b>                                       |          |             |                              |              |                     |         |
| No follow-up                                            | 36       | 1838 (3276) | 33                           | 727 (682)    | 35 (-144 to 213)    | 0.70    |
| Monthly telephone follow-up                             | 15       | 3012 (5261) | 14                           | 1877 (3256)  | 1174 (1037 to 1311) | <0.001  |
| Biweekly telephone follow-up                            | 76       | 1315 (2038) | 68                           | 703 (516)    | 44 (-126 to 214)    | 0.61    |
| Weekly physical follow-up                               | 26       | 2993 (5794) | 24                           | 257 (207)    | -434 (-614 to -255) | <0.001  |
| <b>Total grain (gm/day)<br/>(Secondary outcome)</b>     |          |             |                              |              |                     |         |
| <b>Mode of intervention</b>                             |          |             |                              |              |                     |         |
| Physical intervention                                   | 59       | 544 (182)   | 54                           | 575 (120)    | 12 (-30 to 53)      | 0.58    |
| Digital intervention                                    | 89       | 539 (214)   | 79                           | 500 (106)    | -75 (-99 to -51)    | <0.001  |
| Mixed intervention                                      | 4        | 476 (55)    | 4                            | 502 (102)    | -69 (-93 to -46)    | <0.001  |
| <b>Follow-ups</b>                                       |          |             |                              |              |                     |         |
| No follow-up                                            | 36       | 494 (189)   | 31                           | 549 (73)     | 2 (-18 to 22)       | 0.82    |
| Monthly telephone follow-up                             | 14       | 560 (167)   | 14                           | 423 (85)     | -160 (-181 to -138) | <0.001  |
| Biweekly telephone follow-up                            | 76       | 547 (208)   | 68                           | 515 (103)    | -58 (-86 to -29)    | <0.001  |
| Weekly physical follow-up                               | 26       | 568 (205)   | 24                           | 608 (155)    | 25 (-42 to 92)      | 0.47    |
| <b>Total protein (gm/day)<br/>(Secondary outcome)</b>   |          |             |                              |              |                     |         |
| <b>Control (ITT)</b>                                    | 126      | 343 (166)   | 119                          | 266.5 (91.1) |                     |         |
| <b>Intervention (ITT)</b>                               | 149      | 309 (188)   | 136                          | 251 (88)     | -6 (-30 to 18)      | 0.64    |
| <b>Attendance</b>                                       |          |             |                              |              |                     |         |
| ≥ 1 session                                             | 71       | 316 (181)   | 66                           | 270 (104)    | 11 (-18 to 40)      | 0.45    |
| ≥ 2 sessions                                            | 54       | 330 (185)   | 51                           | 280 (112)    | 19 (-12 to 51)      | 0.23    |
| ≥ 3 sessions                                            | 35       | 335 (184)   | 34                           | 264 (104)    | 1 (-42 to 43)       | 0.98    |
| All four sessions                                       | 21       | 385 (189)   | 21                           | 278 (97)     | 5 (-31 to 42)       | 0.78    |
| <b>Mode of intervention</b>                             |          |             |                              |              |                     |         |
| Physical intervention                                   | 59       | 334 (174)   | 54                           | 280 (100)    | 17 (-3 to 36)       | 0.09    |
| Digital intervention                                    | 81       | 307 (200)   | 78                           | 231 (75)     | -30 (-49 to -10)    | <0.001  |
| Mixed intervention                                      | 4        | 210 (127)   | 4                            | 243 (31)     | 2 (-13 to 17)       | 0.81    |

|                                                           |    |           |    |           |                  |        |
|-----------------------------------------------------------|----|-----------|----|-----------|------------------|--------|
| <b>Follow-ups</b>                                         |    |           |    |           |                  |        |
| No follow-up                                              | 36 | 333 (182) | 31 | 274 (104) | 16 (-11 to 43)   | 0.26   |
| Monthly telephone follow-up                               | 13 | 331 (236) | 13 | 263 (98)  | -3 (-18 to 12)   | 0.67   |
| Biweekly telephone follow-up                              | 69 | 296 (193) | 68 | 227 (66)  | -34 (-53 to -16) | <0.001 |
| Weekly physical follow-up                                 | 26 | 335 (164) | 24 | 284 (99)  | 18 (1 to 34)     | 0.04   |
|                                                           |    |           |    |           |                  |        |
| <b>Fruits and vegetables (gm/day) (Secondary outcome)</b> |    |           |    |           |                  |        |
|                                                           |    |           |    |           |                  |        |
| <b>Mode of intervention</b>                               |    |           |    |           |                  |        |
| Physical intervention                                     | 59 | 194 (103) | 54 | 280 (132) | 8 (-39 to 55)    | 0.73   |
| Digital intervention                                      | 89 | 194 (106) | 78 | 273 (107) | -0.4 (-31 to 31) | 0.98   |
| Mixed intervention                                        | 3  | 275 (88)  | 4  | 226 (43)  | -53 (-74 to -31) | <0.001 |
|                                                           |    |           |    |           |                  |        |
| <b>Follow-ups</b>                                         |    |           |    |           |                  |        |
| No follow-up                                              | 36 | 167 (112) | 31 | 246 (100) | -27 (-54 to 0.5) | 0.05   |
| Monthly telephone follow-up                               | 14 | 196 (79)  | 14 | 274 (107) | -0.7 (-22 to 21) | 0.95   |
| Biweekly telephone follow-up                              | 75 | 206 (105) | 67 | 273 (105) | -1 (-30 to 28)   | 0.93   |
| Weekly physical follow-up                                 | 26 | 205 (100) | 24 | 315 (160) | 40 (-13 to 93)   | 0.14   |

*\*Mean difference between groups estimated by mixed linear model; METs: Metabolic equivalent; gm/day: gram per day; ITT: Intention-to-treat analysis; SD: Standard deviation*
